# Supplementary material for: Random Whole Metagenomic Sequencing for Forensic Discrimination of Soils
Source: PubMed Central journal article supplement (PMC4128759; doi:10.1371/journal.pone.0104996), 2014-08-11
Supplement: pone.0104996.s013.pdf [file pone.0104996.s013.pdf]

| Group | Full sequencing datasets |            | Randomly subsampled datasets |            |
|-------|--------------------------|------------|------------------------------|------------|
|       | Sample name              | MG-RAST ID | Sample name                  | MG-RAST ID |
| SH_A  | AKAn                     | 4533948.3  | An_AN                        | 4553173.3  |
|       | AKAs                     | 4533949.3  | As_AN                        | 4553184.3  |
|       | AKAw                     | 4533950.3  | Aw_AN                        | 4553185.3  |
| SH_B  | AKBe                     | 4533951.3  | Be_AN                        | 4553186.3  |
|       | AKBn                     | 4533952.3  | Bn_AN                        | 4553187.3  |
|       | AKBs                     | 4533953.3  | Bs_AN                        | 4553188.3  |
| AP_A  | APPCR_A4n                | 4549132.3  | APPCR_An_AN                  | 4553174.3  |
|       | APPCR_A4s                | 4549136.3  | APPCR_As_AN                  | 4553178.3  |
|       | APPCR_A4w                | 4549137.3  | APPCR_Aw_AN                  | 4553179.3  |
| AP_B  | APPCR_B4e                | 4549141.3  | APPCR_Be_AN                  | 4553180.3  |
|       | APPCR_B4n                | 4549142.3  | APPCR_Bn_AN                  | 4553181.3  |
|       | APPCR_B4s                | 4549144.3  | APPCR_Bs_AN                  | 4553183.3  |
| WGA_A | AK_WGA_An                | 4543715.3  | WGA_An_AN                    | 4553189.3  |
|       | AK_WGA_As                | 4543716.3  | WGA_As_AN                    | 4553190.3  |
|       | AK_WGA_Aw                | 4543717.3  | WGA_Aw_AN                    | 4553191.3  |
| WGA_B | AK_WGA_Be                | 4543718.3  | WGA_Be_AN                    | 4553192.3  |
|       | AK_WGA_Bn                | 4543719.3  | WGA_Bn_AN                    | 4553193.3  |
|       | AK_WGA_Bs                | 4543720.3  | WGA_Bs_AN                    | 4553194.3  |
