# Supplementary material for: Random Whole Metagenomic Sequencing for Forensic Discrimination of Soils
Source: PubMed Central journal article supplement (PMC4128759; doi:10.1371/journal.pone.0104996), 2014-08-11
Supplement: pone.0104996.s014.pdf [file pone.0104996.s014.pdf]

| MSNR          |                     | WGA    |        |        |        |        |        | SH    |       |       |       |       |       | AP    |       |       |       |       |       |
|---------------|---------------------|--------|--------|--------|--------|--------|--------|-------|-------|-------|-------|-------|-------|-------|-------|-------|-------|-------|-------|
| domain        | phylum              | WGA_Aw | WGA_As | WGA_An | WGA_Bn | WGA_Bs | WGA_Be | SH_As | SH_An | SH_Aw | SH_Be | SH_Bn | SH_Bs | AP_An | AP_Aw | AP_As | AP_Bs | AP_Bn | AP_Be |
| Archaea       | Thaumarchaeota      | 0.63   | 0.32   | 0.11   | 0.25   | 0.02   | 0.05   | 0.09  | 0.2   | 0.41  | 0.12  | 0.04  | 0.22  | 0     | 0     | 0     | 0.02  | 0     | 0     |
|               | Crenarchaeota       | 0.2    | 0.16   | 0.03   | 0.13   | 0.03   | 0.06   | 0.08  | 0.15  | 0.16  | 0.08  | 0.04  | 0.1   | 0.04  | 0.08  | 0.06  | 0.01  | 0.01  | 0.03  |
|               | Euryarchaeota       | 0.97   | 0.63   | 0.38   | 0.49   | 0.35   | 0.29   | 0.34  | 0.43  | 0.54  | 0.45  | 0.32  | 0.43  | 0.84  | 0.54  | 0.29  | 0.19  | 0.16  | 0.13  |
|               | Total               | 1.83   | 1.16   | 0.53   | 0.89   | 0.4    | 0.41   | 0.52  | 0.78  | 1.13  | 0.67  | 0.4   | 0.76  | 0.88  | 0.62  | 0.37  | 0.22  | 0.17  | 0.16  |
| Bacteria      | Verrucomicrobia     | 1.92   | 2.14   | 1.57   | 2.82   | 2.23   | 1.54   | 1.29  | 1.71  | 1.32  | 1.52  | 2.25  | 2.05  | 1.21  | 1.12  | 2.26  | 2.44  | 1.83  | 1.94  |
|               | Bacteroidetes       | 18.56  | 21.07  | 23.98  | 20.27  | 8.48   | 5.67   | 11.5  | 8.66  | 7.16  | 8.11  | 13.09 | 8.78  | 10.15 | 4.41  | 9.45  | 6.59  | 4.6   | 6.43  |
|               | Actinobacteria      | 14.35  | 12.31  | 11.2   | 9.42   | 28.1   | 41.56  | 26.02 | 30.27 | 34.04 | 33.8  | 19.77 | 25.86 | 11.93 | 24.45 | 12.33 | 7     | 9.84  | 11.73 |
|               | Chlorobi            | 0.68   | 0.55   | 0.48   | 0.48   | 0.18   | 0.22   | 0.27  | 0.35  | 0.3   | 0.3   | 0.31  | 0.36  | 0.34  | 0.1   | 0.16  | 1.16  | 1.74  | 1.38  |
|               | Nitrospirae         | 0.2    | 0.2    | 0.11   | 0.38   | 0.12   | 0.1    | 0.07  | 0.16  | 0.18  | 0.12  | 0.14  | 0.21  | 0.05  | 0.14  | 0.05  | 0.09  | 0.14  | 0.18  |
|               | Deinococcus-Thermus | 0.59   | 0.37   | 0.45   | 0.46   | 0.38   | 0.46   | 0.38  | 0.47  | 0.54  | 0.4   | 0.44  | 0.41  | 0.56  | 0.48  | 0.25  | 0.55  | 0.29  | 0.47  |
|               | Gemmatimonadetes    | 0.17   | 0.11   | 0.12   | 0.16   | 0.22   | 0.21   | 0.14  | 0.21  | 0.32  | 0.26  | 0.27  | 0.34  | 0.64  | 0.28  | 0.59  | 2.9   | 5.25  | 4.22  |
|               | Acidobacteria       | 1.68   | 1.6    | 1.44   | 2.23   | 1.69   | 1.12   | 1.1   | 1.45  | 1.31  | 1.3   | 1.8   | 1.68  | 6.06  | 4.78  | 6.96  | 5.03  | 6.52  | 5.57  |
|               | Spirochaetes        | 0.22   | 0.25   | 0.24   | 0.27   | 0.11   | 0.12   | 0.14  | 0.12  | 0.19  | 0.16  | 0.18  | 0.23  | 0.02  | 0.08  | 0.04  | 0.06  | 0.02  | 0.03  |
|               | Firmicutes          | 3.84   | 3.6    | 2.61   | 3.01   | 2.02   | 2.1    | 2.33  | 2.87  | 2.98  | 2.5   | 2.5   | 2.82  | 2.81  | 2.18  | 1.34  | 0.66  | 0.75  | 1.06  |
|               | Chloroflexi         | 2.41   | 1.73   | 1.17   | 1.26   | 0.99   | 0.98   | 1.03  | 1.58  | 1.81  | 0.99  | 0.96  | 1.27  | 1.6   | 3.48  | 5.34  | 7.12  | 6.78  | 5.23  |
|               | Planctomycetes      | 2.46   | 3.01   | 1.26   | 3.42   | 2.8    | 2.31   | 1.5   | 2.84  | 2.64  | 2.87  | 3     | 3.21  | 0.88  | 4.57  | 5.75  | 1.84  | 1.87  | 2.05  |
|               | Proteobacteria      | 34.05  | 33.18  | 30.43  | 33.67  | 37.43  | 31.06  | 39.36 | 35.78 | 34.42 | 33.76 | 38.93 | 38.2  | 38.65 | 36.81 | 39.54 | 46.54 | 44.77 | 44.35 |
|               | Chlamydiae          | 0.11   | 0.07   | 0.05   | 0.09   | 0.07   | 0.07   | 0.07  | 0.08  | 0.05  | 0.08  | 0.08  | 0.07  | 0.04  | 0.02  | 0.02  | 0.01  | 0.02  | 0.02  |
| Cyanobacteria | 2.48                | 2.25   | 1.4    | 1.71   | 1.16   | 1.06   | 1.03   | 1.34  | 1.61  | 1.16  | 1.25  | 1.29  | 1.26  | 1.47  | 1.12  | 1.02  | 0.77  | 0.88  |       |
| Total         | 84.89               | 83.66  | 77.41  | 80.76  | 86.73  | 89.26  | 87.06  | 88.81 | 89.87 | 88.12 | 85.95 | 87.78 | 77.03 | 86.08 | 85.74 | 83.44 | 85.54 | 85.95 |       |
| Eukaryota     | Ascomycota          | 2.45   | 4.13   | 10.99  | 6.76   | 3.74   | 1.89   | 3.25  | 1.12  | 0.61  | 2.05  | 3.37  | 1.99  | 6.05  | 1.08  | 2.03  | 2.17  | 0.55  | 1.49  |
|               | Streptophyta        | 0.29   | 0.36   | 0.24   | 0.23   | 0.12   | 0.14   | 0.18  | 0.2   | 0.17  | 0.16  | 0.19  | 0.18  | 0.3   | 0.47  | 1.43  | 2.6   | 1.71  | 1.92  |
|               | Chordata            | 0.48   | 0.44   | 0.49   | 0.25   | 0.2    | 0.25   | 0.25  | 0.32  | 0.15  | 0.3   | 0.19  | 0.2   | 0.1   | 0.1   | 0.03  | 0.04  | 0.01  | 0.02  |
|               | Basidiomycota       | 0.1    | 0.14   | 0.37   | 0.28   | 0.11   | 0.07   | 0.12  | 0.07  | 0.03  | 0.07  | 0.12  | 0.04  | 0.19  | 0.17  | 0.07  | 0.04  | 0.01  | 0.04  |
|               | Arthropoda          | 0.19   | 0.44   | 0.19   | 0.13   | 0.05   | 0.18   | 0.13  | 0.24  | 0.04  | 0.29  | 0.08  | 0.07  | 0.03  | 0.07  | 0.04  | 0.04  | 0     | 0.05  |
| Total         | 4.07                | 6.13   | 12.83  | 8.18   | 4.53   | 2.85   | 4.24   | 2.25  | 1.28  | 3.24  | 4.31  | 2.83  | 6.85  | 2.14  | 3.69  | 5.02  | 2.35  | 3.61  |       |
