# Supplementary material for: Random Whole Metagenomic Sequencing for Forensic Discrimination of Soils
Source: PubMed Central journal article supplement (PMC4128759; doi:10.1371/journal.pone.0104996), 2014-08-11
Supplement: pone.0104996.s015.pdf [file pone.0104996.s015.pdf]

| M5RNA     |                | WGA    |        |        |        |        |        | SH    |       |       |       |       |       | AP    |       |       |       |       |       |
|-----------|----------------|--------|--------|--------|--------|--------|--------|-------|-------|-------|-------|-------|-------|-------|-------|-------|-------|-------|-------|
| domain    | phylum         | WGA_Aw | WGA_As | WGA_An | WGA_Bn | WGA_Bs | WGA_Be | SH_As | SH_An | SH_Aw | SH_Be | SH_Bn | SH_Bs | AP_An | AP_Aw | AP_As | AP_Bs | AP_Bn | AP_Be |
| Bacteria  | Bacteroidetes  | 7.1    | 9.4    | 8.8    | 3.1    | 2.6    | 4.2    | 3.5   | 3.4   | 4.0   | 2.8   | 3.6   | 2.7   | N/A   |       |       |       |       |       |
|           | Actinobacteria | 38.1   | 31.3   | 17.6   | 32.3   | 52.6   | 56.3   | 38.1  | 51.7  | 48.0  | 47.7  | 36.1  | 59.5  |       |       |       |       |       |       |
|           | Proteobacteria | 21.4   | 31.3   | 32.4   | 21.5   | 18.4   | 14.6   | 23.0  | 20.2  | 12.0  | 15.6  | 26.5  | 10.8  |       |       |       |       |       |       |
|           | Total          | 88.1   | 90.6   | 66.2   | 64.6   | 81.6   | 77.1   | 75.2  | 84.3  | 74.7  | 71.6  | 74.7  | 82.4  |       |       |       |       |       |       |
| Eukaryota | Ascomycota     | 0.0    | 3.1    | 8.8    | 4.6    | 5.3    | 6.3    | 8.8   | 1.1   | 5.3   | 11.0  | 13.3  | 6.8   |       |       |       |       |       |       |
|           | Streptophyta   | 0.0    | 0.0    | 8.8    | 1.5    | 5.3    | 2.1    | 1.8   | 0.0   | 1.3   | 2.8   | 4.8   | 0.0   |       |       |       |       |       |       |
|           | Total          | 4.8    | 3.1    | 17.6   | 18.5   | 10.5   | 16.7   | 16.8  | 14.6  | 13.3  | 24.8  | 22.9  | 12.2  |       |       |       |       |       |       |
