# Supplementary material for: Random Whole Metagenomic Sequencing for Forensic Discrimination of Soils
Source: PubMed Central journal article supplement (PMC4128759; doi:10.1371/journal.pone.0104996), 2014-08-11
Supplement: pone.0104996.s016.pdf [file pone.0104996.s016.pdf]

| SEED Subsystems                                  | WGA    |        |        |        |        |        | SH    |       |       |       |       |       | AP    |       |       |       |       |       |
|--------------------------------------------------|--------|--------|--------|--------|--------|--------|-------|-------|-------|-------|-------|-------|-------|-------|-------|-------|-------|-------|
| Level 1                                          | WGA_Aw | WGA_As | WGA_An | WGA_Bn | WGA_Bs | WGA_Be | SH_As | SH_An | SH_Aw | SH_Be | SH_Bn | SH_Bs | AP_An | AP_Aw | AP_As | AP_Bs | AP_Bn | AP_Be |
| Clustering-based subsystems                      | 14.3   | 14.4   | 15.5   | 14.8   | 15.0   | 14.8   | 14.7  | 15.1  | 15.6  | 15.0  | 15.1  | 15.0  | 11.3  | 9.6   | 13.7  | 17.9  | 17.1  | 16.4  |
| Carbohydrates                                    | 12.5   | 12.1   | 12.1   | 12.5   | 12.1   | 13.5   | 11.8  | 12.4  | 12.9  | 13.2  | 11.2  | 12.3  | 18.5  | 19.9  | 18.4  | 14.9  | 13.3  | 16.6  |
| Amino Acids and Derivatives                      | 8.4    | 8.0    | 7.9    | 8.3    | 8.9    | 9.0    | 8.7   | 8.5   | 8.2   | 8.4   | 8.4   | 8.4   | 10.5  | 7.1   | 6.0   | 8.1   | 5.3   | 6.6   |
| Protein Metabolism                               | 7.4    | 8.1    | 8.2    | 7.8    | 8.0    | 7.6    | 7.5   | 7.7   | 7.8   | 7.6   | 7.5   | 8.2   | 9.1   | 7.1   | 17.3  | 17.9  | 16.4  | 16.7  |
| Miscellaneous                                    | 7.0    | 7.2    | 7.7    | 7.2    | 7.0    | 6.9    | 8.3   | 8.2   | 7.8   | 8.3   | 7.9   | 8.0   | 7.0   | 9.5   | 7.1   | 4.7   | 3.8   | 4.7   |
| Cofactors, Vitamins, Prosthetic Groups, Pigments | 5.4    | 6.2    | 6.2    | 6.1    | 6.2    | 6.6    | 5.9   | 6.4   | 6.1   | 6.4   | 6.3   | 6.3   | 7.6   | 5.6   | 12.3  | 18.8  | 20.6  | 15.5  |
| DNA Metabolism                                   | 4.7    | 4.5    | 4.2    | 4.2    | 4.0    | 3.6    | 4.1   | 3.8   | 3.9   | 3.7   | 4.2   | 3.9   | 8.5   | 3.9   | 1.2   | 1.6   | 1.4   | 1.4   |
| RNA Metabolism                                   | 3.7    | 3.7    | 3.8    | 3.9    | 3.6    | 3.2    | 3.2   | 3.3   | 3.2   | 3.4   | 3.8   | 3.4   | 2.7   | 2.6   | 1.2   | 1.1   | 0.4   | 0.8   |
| Respiration                                      | 3.5    | 3.1    | 2.2    | 2.5    | 1.5    | 1.3    | 1.7   | 1.6   | 1.4   | 1.5   | 1.6   | 1.7   | 0.6   | 0.6   | 0.4   | 0.2   | 0.2   | 0.5   |
| Membrane Transport                               | 3.4    | 3.3    | 3.7    | 3.5    | 3.4    | 3.1    | 3.7   | 3.8   | 3.5   | 3.5   | 3.8   | 3.3   | 5.4   | 3.4   | 5.7   | 4.5   | 2.8   | 3.8   |
| Cell Wall and Capsule                            | 3.4    | 4.0    | 3.6    | 3.2    | 3.2    | 3.2    | 3.7   | 3.5   | 3.2   | 3.3   | 3.5   | 3.1   | 1.3   | 4.0   | 2.0   | 0.9   | 0.9   | 1.1   |
| Fatty Acids, Lipids, and Isoprenoids             | 3.1    | 3.1    | 3.3    | 3.5    | 3.4    | 3.9    | 3.5   | 3.8   | 3.8   | 3.4   | 3.3   | 3.6   | 4.6   | 8.4   | 3.3   | 0.9   | 0.9   | 0.9   |
| Stress Response                                  | 2.9    | 3.1    | 2.8    | 3.1    | 2.8    | 2.5    | 2.6   | 2.4   | 2.5   | 2.5   | 3.1   | 2.9   | 0.5   | 2.5   | 0.8   | 0.3   | 0.3   | 0.6   |
| Nucleosides and Nucleotides                      | 2.8    | 2.7    | 2.8    | 2.8    | 3.4    | 3.5    | 3.3   | 3.2   | 3.4   | 3.4   | 3.4   | 3.2   | 1.3   | 2.2   | 1.1   | 0.4   | 0.3   | 0.4   |
| Virulence, Disease and Defense                   | 2.7    | 2.5    | 2.5    | 2.6    | 3.0    | 2.7    | 2.9   | 2.7   | 2.7   | 2.9   | 2.7   | 2.9   | 2.0   | 1.4   | 1.2   | 1.1   | 0.9   | 0.7   |
| Metabolism of Aromatic Compounds                 | 2.7    | 2.8    | 2.8    | 2.7    | 2.9    | 3.0    | 2.9   | 2.7   | 2.6   | 2.7   | 2.6   | 2.7   | 3.2   | 4.4   | 3.2   | 3.6   | 8.6   | 7.0   |
| Other                                            | 12.3   | 11.4   | 10.9   | 11.1   | 11.7   | 11.6   | 11.5  | 11.0  | 11.3  | 10.9  | 11.5  | 11.1  | 5.8   | 7.7   | 5.1   | 3.2   | 6.8   | 6.4   |
