# Supplementary material for: Random Whole Metagenomic Sequencing for Forensic Discrimination of Soils
Source: PubMed Central journal article supplement (PMC4128759; doi:10.1371/journal.pone.0104996), 2014-08-11
Supplement: pone.0104996.s017.pdf [file pone.0104996.s017.pdf]

| Original Group         | AP_A                                                       | AP_B | WGA_A | WGA_B                 | SH_A | SH_B  |
|------------------------|------------------------------------------------------------|------|-------|-----------------------|------|-------|
| Taxonomy level         | <i>phylum</i> ( $m = 2, \delta_1^2 = 0.97, P = 0.0001$ )   |      |       |                       |      |       |
| % correct              | 100                                                        | 100  | 100   | 0                     | 33   | 33    |
| correct/total          | 3/3                                                        | 3/3  | 3/3   | 0/3                   | 1/3  | 1/3   |
| Misclassified to group | n/a                                                        | n/a  | n/a   | SH_A<br>SH_B<br>WGA_A | SH_B | SH_A  |
| Taxonomy level         | <i>class</i> ( $m = 5, \delta_1^2 = 0.98, P = 0.0001$ )    |      |       |                       |      |       |
| % correct              | 100                                                        | 100  | 100   | 0                     | 67   | 67    |
| correct/total          | 3/3                                                        | 3/3  | 3/3   | 0/3                   | 2/3  | 2/3   |
| Misclassified to group | n/a                                                        | n/a  | n/a   | SH_B<br>WGA_A         | SH_B | WGA_B |
| Taxonomy level         | <i>order</i> ( $m = 3, \delta_1^2 = 0.98, P = 0.0001$ )    |      |       |                       |      |       |
| % correct              | 100                                                        | 100  | 100   | 0                     | 33   | 67    |
| correct/total          | 3/3                                                        | 3/3  | 3/3   | 0/3                   | 1/3  | 2/3   |
| Misclassified to group | n/a                                                        | n/a  | n/a   | SH_B<br>WGA_A         | SH_B | SH_A  |
| Taxonomy level         | <i>family</i> ( $m = 9, \delta_1^2 = 0.99, P = 0.0081$ )   |      |       |                       |      |       |
| % correct              | 100                                                        | 100  | 100   | 0                     | 67   | 67    |
| correct/total          | 3/3                                                        | 3/3  | 3/3   | 0/3                   | 2/3  | 2/3   |
| Misclassified to group | n/a                                                        | n/a  | n/a   | SH_B<br>WGA_A<br>SH_A | SH_B | WGA_B |
| Taxonomy level         | <i>genus</i> ( $m = 10, \delta_1^2 = 0.99, P = 0.0078$ )   |      |       |                       |      |       |
| % correct              | 100                                                        | 100  | 100   | 0                     | 67   | 67    |
| correct/total          | 3/3                                                        | 3/3  | 3/3   | 0/3                   | 2/3  | 2/3   |
| Misclassified to group | n/a                                                        | n/a  | n/a   | SH_B<br>WGA_A<br>SH_A | SH_B | SH_A  |
| Taxonomy level         | <i>species</i> ( $m = 10, \delta_1^2 = 0.99, P = 0.0621$ ) |      |       |                       |      |       |
| % correct              | 100                                                        | 100  | 100   | 0                     | 67   | 67    |
| correct/total          | 3/3                                                        | 3/3  | 3/3   | 0/3                   | 2/3  | 2/3   |
| Misclassified to group | n/a                                                        | n/a  | n/a   | SH_B<br>WGA_A<br>SH_A | SH_B | SH_A  |
