# Supplementary material for: Random Whole Metagenomic Sequencing for Forensic Discrimination of Soils
Source: PubMed Central journal article supplement (PMC4128759; doi:10.1371/journal.pone.0104996), 2014-08-11
Supplement: pone.0104996.s018.pdf [file pone.0104996.s018.pdf]

| <b>Original Group</b>  | <b>AP_A</b>                                                        | <b>AP_B</b> | <b>WGA_A</b> | <b>WGA_B</b>          | <b>SH_A</b> | <b>SH_B</b> |
|------------------------|--------------------------------------------------------------------|-------------|--------------|-----------------------|-------------|-------------|
| Metabolic level        | <b><i>level 1</i></b> ( $m = 5, \delta_1^2 = 0.96, P = 0.0001$ )   |             |              |                       |             |             |
| % correct              | 100                                                                | 100         | 100          | 0                     | 67          | 67          |
| correct/total          | 3/3                                                                | 3/3         | 3/3          | 0/3                   | 2/3         | 2/3         |
| Misclassified to group | n/a                                                                | n/a         | n/a          | SH_A<br>SH_B<br>WGA_A | SH_B        | SH_A        |
| Metabolic level        | <b><i>level 2</i></b> ( $m = 2, \delta_1^2 = 0.99, P = 0.0001$ )   |             |              |                       |             |             |
| % correct              | 100                                                                | 100         | 100          | 0                     | 67          | 100         |
| correct/total          | 3/3                                                                | 3/3         | 3/3          | 0/3                   | 2/3         | 3/3         |
| Misclassified to group | n/a                                                                | n/a         | n/a          | SH_B<br>WGA_A<br>SH_A | SH_B        | n/a         |
| Metabolic level        | <b><i>level 3</i></b> ( $m = 2, \delta_1^2 = 0.99, P = 0.0001$ )   |             |              |                       |             |             |
| % correct              | 100                                                                | 100         | 100          | 0                     | 67          | 100         |
| correct/total          | 3/3                                                                | 3/3         | 3/3          | 0/3                   | 2/3         | 3/3         |
| Misclassified to group | n/a                                                                | n/a         | n/a          | SH_B<br>WGA_A<br>SH_A | SH_B        | n/a         |
| Metabolic level        | <b><i>functions</i></b> ( $m = 3, \delta_1^2 = 0.99, P = 0.0001$ ) |             |              |                       |             |             |
| % correct              | 100                                                                | 100         | 100          | 0                     | 33          | 100         |
| correct/total          | 3/3                                                                | 3/3         | 3/3          | 0/3                   | 1/3         | 3/3         |
| Misclassified to group | n/a                                                                | n/a         | n/a          | SH_B<br>WGA_A<br>SH_B | SH_B        | n/a         |
