# Supplementary material for: Random Whole Metagenomic Sequencing for Forensic Discrimination of Soils
Source: PubMed Central journal article supplement (PMC4128759; doi:10.1371/journal.pone.0104996), 2014-08-11
Supplement: pone.0104996.s019.pdf [file pone.0104996.s019.pdf]

| <b>Original Group</b>  | <b>WGA_A</b>                                                    | <b>WGA_B</b> | <b>SH_A</b> | <b>SH_B</b>   |
|------------------------|-----------------------------------------------------------------|--------------|-------------|---------------|
| Taxonomy level         | <b><i>phylum</i></b> ( $m = 9, \delta_1^2 = 1, P = 0.207$ )     |              |             |               |
| % correct              | 100                                                             | 33           | 33          | 0             |
| correct/total          | 3/3                                                             | 1/3          | 1/3         | 0/3           |
| Misclassified to group | n/a                                                             | SH_B         | SH_B        | SH_A<br>WGA_B |
| Taxonomy level         | <b><i>class</i></b> ( $m = 5, \delta_1^2 = 0.936, P = 0.039$ )  |              |             |               |
| % correct              | 33                                                              | 0            | 33          | 100           |
| correct/total          | 1/3                                                             | 0/3          | 1/3         | 3/3           |
| Misclassified to group | SH_B                                                            | SH_A<br>SH_B | SH_B        | n/a           |
| Taxonomy level         | <b><i>order</i></b> ( $m = 4, \delta_1^2 = 0.928, P = 0.009$ )  |              |             |               |
| % correct              | 66                                                              | 0            | 66          | 100           |
| correct/total          | 2/3                                                             | 0/3          | 2/3         | 3/3           |
| Misclassified to group | SH_B                                                            | SH_A<br>SH_B | SH_B        | n/a           |
| Taxonomy level         | <b><i>family</i></b> ( $m = 6, \delta_1^2 = 0.99, P = 0.0108$ ) |              |             |               |
| % correct              | 66                                                              | 0            | 66          | 66            |
| correct/total          | 2/3                                                             | 0/3          | 2/3         | 2/3           |
| Misclassified to group | SH_B                                                            | SH_B         | SH_B        | WGA_B         |
| Taxonomy level         | <b><i>genus</i></b> ( $m = 8, \delta_1^2 = 0.99, P = 0.0008$ )  |              |             |               |
| % correct              | 100                                                             | 0            | 100         | 33            |
| correct/total          | 3/3                                                             | 0/3          | 3/3         | 1/3           |
| Misclassified to group | n/a                                                             | SH_A<br>SH_B | n/a         | SH_A<br>WGA_B |
| Taxonomy level         | <b><i>species</i></b> ( $m = 8, \delta_1^2 = 0.99, P = 0.003$ ) |              |             |               |
| % correct              | 100                                                             | 0            | 66          | 33            |
| correct/total          | 3/3                                                             | 0/3          | 2/3         | 1/3           |
| Misclassified to group | n/a                                                             | SH_B         | SH_B        | SH_A<br>WGA_B |
